# Supplementary material for: Diversification of habenular organization and asymmetries in teleosts: Insights from the Atlantic salmon and European eel
Source: Frontiers journal article supplement (doi:10.3389/fcell.2022.1015074), 2022-11-03
Supplement: Data_Sheet_14.PDF [file Data_Sheet_14.PDF]

| Parr Upper mode |                |          |        |          |        |
|-----------------|----------------|----------|--------|----------|--------|
| Individual      | Section number | Left     |        | Right    |        |
|                 |                | Ventral  | Dorsal | Ventral  | Dorsal |
| N°1             | 33/72          | 94       | 61     | 92       | 73     |
|                 | 39/72          | 80       | 60     | 89       | 61     |
|                 | Σ              | 174      | 121    | 181      | 134    |
| N°2             | 30/60          | 113      | 68     | 102      | 66     |
|                 | 33/60          | 114      | 57     | 99       | 69     |
|                 | Σ              | 227      | 125    | 201      | 135    |
| N°3             | 27/72          | 109      | 67     | 106      | 76     |
|                 | 35/72          | 141      | 65     | 148      | 83     |
|                 | Σ              | 250      | 132    | 254      | 159    |
| P-value         |                | 4.32E-02 |        | 3.82E-02 |        |

| Smolt      |                |          |        |          |        |
|------------|----------------|----------|--------|----------|--------|
| Individual | Section number | Left     |        | Right    |        |
|            |                | Ventral  | Dorsal | Ventral  | Dorsal |
| N°1        | 32/70          | 90       | 48     | 104      | 55     |
|            | 35/70          | 86       | 61     | 90       | 54     |
|            | Σ              | 176      | 109    | 194      | 109    |
| N°2        | 37/72          | 100      | 68     | 95       | 75     |
|            | 43/72          | 100      | 62     | 92       | 67     |
|            | Σ              | 200      | 130    | 187      | 142    |
| N°3        | 32/60          | 83       | 51     | 94       | 50     |
|            | 40/60          | 84       | 50     | 87       | 60     |
|            | Σ              | 167      | 101    | 181      | 110    |
| P-value    |                | 3.15E-04 |        | 2.93E-02 |        |

**Supplementary Table 3. Comparison of nuclei densities between dorsal and ventral habenula territories in Atlantic salmon upper parr (upper panel) and smolt (lower panel).** For each smoltification status, the number of nuclei observed within a 3700 µm<sup>2</sup> area of Yo-Pro1 stained sections was counted (see examples of the areas taken into account in Supplementary Figure 1L. Countings were performed for 3 specimens (column 1), and on 2 sections selected in the medial part of the left and right habenulae (section numbers in column 2) per specimen. A paired Student t-test was conducted, taking the sum of counted nuclei for each territory (left, third and fourth columns; right, fifth and sixth columns), with the following null hypothesis "absence of significant difference in the number of nuclei counted in ventral versus dorsal territories". In each case, p-values (<5E-02) support the hypothesis that nuclei densities are higher in ventral territories than in dorsal ones.
